# Intestinal and Cerebral Oxygenation during Severe Isovolemic Hemodilution and Subsequent Hyperoxic Ventilation in a Pig Model

Jasper van Bommel, M.D., Ph.D.,\* Adrianus Trouwborst, M.D., Ph.D.,† Lothar Schwarte, M.D.,‡ Martin Siegemund, M.D.,§ Can Ince, Ph.D.,|| Ch. Pieter Henney, M.D., Ph.D.¶

**Background:** During severe isovolemic hemodilution, determination of critical hematocrit levels for the microvascular oxygenation of different organs might provide more insight into the effect of the redistribution of blood flow and oxygen delivery on the oxygenation of different organs. The effect of an increased amount of dissolved oxygen on tissue oxygenation during severely decreased hematocrit levels is not clear.

**Methods:** Fifteen anesthetized pigs were randomized between an experimental group ( $n = 10$ ), in which severe isovolemic hemodilution was performed with 6% hydroxyethylstarch (1:1), and a time-matched control group ( $n = 5$ ). Systemic, intestinal, and cerebral hemodynamic and oxygenation parameters were monitored. Microvascular oxygen partial pressure ( $\mu\text{Po}_2$ ) was measured in the cerebral cortex and the intestinal serosa and mucosa, using the oxygen-dependent quenching of Pd-porphyrin phosphorescence. In the final phase of the experiment, fraction of inspired oxygen was increased to 1.0.

**Results:** Hemodilution decreased hematocrit from  $25.3 \pm 3.0$  to  $7.6 \pm 1.2\%$  (mean  $\pm$  SD). Systemic and intestinal oxygen delivery fell with the onset of hemodilution; intestinal oxygen consumption decreased at a hematocrit of 9.9%, whereas the systemic oxygen consumption decreased at a hematocrit of 7.6%. During hemodilution, the intestinal and cerebral oxygen extraction ratios increased from baseline with 130 and 52%, respectively. Based on the intersection of the two best-fit regression lines, determined by a least sum of squares technique, similar critical hematocrit levels were found for systemic oxygen consumption and the cerebral and intestinal mucosa  $\mu\text{Po}_2$ ; the intestinal serosa  $\mu\text{Po}_2$  decreased at an earlier stage ( $P < 0.05$ ). Hyperoxic ventilation improved the  $\mu\text{Po}_2$  values but not systemic or intestinal oxygen consumption.

**Conclusions:** During isovolemic hemodilution, the diminished oxygen supply was redistributed in favor of organs with a lower capacity to increase oxygen extraction. It is hypothesized that redirection of the oxygen supply within the intestines resulted in the preservation of oxygen consumption and mucosal  $\mu\text{Po}_2$  compared with serosal  $\mu\text{Po}_2$ .

ACUTE isovolemic hemodilution is a commonly used technique to delay or eliminate the need for transfusion of homologous blood during surgery. Although the oxy-

gen content of the blood is reduced during this procedure, the whole body oxygen consumption ( $\dot{V}\text{O}_2$ ) is maintained by an increase in cardiac output and an increase in the oxygen extraction ratio ( $\text{O}_2\text{ER}$ ) of the tissues. A critical level of hemodilution is reached when the oxygen delivery ( $\text{Do}_2$ ) falls below a critical point and compensatory mechanisms become insufficient:  $\dot{V}\text{O}_2$  becomes dependent on supply, decreasing at the same rate as the  $\text{Do}_2$ . Such critical levels of hemodilution have been determined for systemic  $\text{Do}_2$  and  $\dot{V}\text{O}_2$  in anesthetized animals<sup>1–5</sup> and in an anesthetized human patient.<sup>6</sup> In a similar way, a critical level of hemodilution can be determined for an organ system: using an anesthetized rat model, similar critical levels of hemodilution were found for the intestinal oxygen consumption and intestinal microvascular oxygen partial pressure ( $\mu\text{Po}_2$ ).<sup>7</sup>

During hemodilution, a redistribution of cardiac output and oxygen transport occurs in favor of organs with a lower capacity to increase oxygen extraction, *i.e.*, heart and brain.<sup>8–11</sup> Other organs, for example, the intestines, are supposed to compensate for the decreased oxygen content of the blood, mainly by an increase in oxygen extraction.<sup>1,12,13</sup> In a similar way, a redistribution of the oxygen flux might occur within an organ during hemodilution.<sup>8,14</sup> Thus, it can be hypothesized that a critical hemodilution level for the systemic  $\dot{V}\text{O}_2$  will not reflect the critical levels of hemodilution for the oxygenation of different organ systems; (parts of) organs that respond differently to a decrease in hematocrit might display different critical levels of hemodilution. Because in Jehovah's Witness patients hyperoxia has been used during critical anemia, we also hypothesized that beyond these critical hemodilution levels, an increase in the arterial oxygen content caused by an increase in the inspired oxygen fraction ( $\text{FiO}_2$ ) to 1.0 could restore local and systemic oxygenation.

Based on these hypotheses, the present study was designed to determine the critical levels of hemodilution for the oxygen consumption of the whole body and the intestines. In addition, critical levels were determined for the microvascular oxygenation of the cerebral cortex and the intestinal mucosa and serosa. Comparison of the latter two parameters with the intestinal oxygen consumption was expected to provide more insight into the redistribution of the oxygen flux within the intestines during isovolemic hemodilution. Because in a rat model, which was used in a previous study,<sup>7</sup> only the intestinal oxygenation could be assessed, an anesthetized pig

\* Research Associate, Department of Anesthesiology, Erasmus Medical Center, Rotterdam, The Netherlands. † Professor and Chairman, § Senior Research Associate, || Professor, # Associate Professor, Department of Anesthesiology, Academic Medical Center, University of Amsterdam. ‡ Research Associate, Department of Anesthesiology, Heinrich-Heine University, Düsseldorf, Germany.

Received from the Department of Anesthesiology, Academic Medical Center, University of Amsterdam, Amsterdam, The Netherlands. Submitted for publication November 2, 2000. Accepted for publication April 1, 2002. Support was provided solely from institutional and/or departmental sources. Presented at the annual congress of the European Society of Intensive Care Medicine, Rome, Italy, October 1–4, 2000.

Address reprint requests to Dr. Trouwborst: Department of Anesthesiology, Academic Medical Center, University of Amsterdam, Meibergdreef 9, 1105 AZ Amsterdam, The Netherlands. Address electronic mail to: a.trouwborst@amc.uva.nl. Individual article reprints may be purchased through the Journal Web site, [www.anesthesiology.org](http://www.anesthesiology.org).

model was used for the present study, with the additional advantage that the responses of this animal to several conditions of stress have been demonstrated to be similar to those of humans.<sup>15,16</sup>

## Materials and Methods

### Animals

The protocol of the present study was approved by the Animal Research Committee of the Academic Medical Center at the University of Amsterdam. Animal care and handling were performed in accordance with the national guidelines for care of laboratory animals. The experiments were performed in 15 crossbred Landrace x Yorkshire pigs, 10–12 weeks old, with a mean ( $\pm$  SD) body weight of  $25 \pm 2$  kg.

### Experimental Preparation

After an overnight fast with free access to water, the animals were sedated with an intramuscular injection of ketamine (20 mg/kg), midazolam (1 mg/kg), and atropine (0.5 mg). Anesthesia was induced with thiopental (5 mg/kg intravenously) and was maintained by intravenous infusion of midazolam (0.2 mg/kg bolus, followed by  $0.2 \text{ mg} \cdot \text{kg}^{-1} \cdot \text{h}^{-1}$ ) and fentanyl (20  $\mu\text{g/kg}$  bolus, followed by  $10 \mu\text{g} \cdot \text{kg}^{-1} \cdot \text{h}^{-1}$ ). Muscle relaxation was obtained with pancuronium bromide (0.1 mg/kg bolus, followed by  $0.1 \text{ mg} \cdot \text{kg}^{-1} \cdot \text{h}^{-1}$ ).

Identical anesthetic protocols have proven to be adequate for similar acute experiments in pigs.<sup>8,14,17,18</sup> One separate time-matched sham-operated animal was anesthetized without the use of muscle relaxants to ensure that the anesthetic regimen was adequate. After tracheal intubation, ventilation was performed (AV-1; Drägerwerke, Lübeck, Germany) with oxygen in air ( $\text{FiO}_2$ , 0.33), maintaining normocapnia. As maintenance fluid, a crystalloid solution (Ringer's lactate) was administered ( $15 \text{ ml} \cdot \text{kg}^{-1} \cdot \text{h}^{-1}$ ). Central body temperature was maintained at approximately  $37^\circ\text{C}$  with a heating pad and isolation blankets.

Catheters were placed in the right brachial artery (6 French) for the measurement of arterial blood pressure and collection of arterial blood samples, the right brachial vein (14 gauge) for the administration of fluids, and the left femoral artery (8 French) for blood withdrawal during exchange transfusion. For the collection of jugular venous blood samples, a catheter (4 French) was inserted cranially into the right internal jugular vein in such a way that the tip of the catheter reached at least to the base of the skull. In this way, the internal jugular venous oxygen measurements were assumed to reflect the venous outflow of the brain in the jugular bulb, with a minimum of extracranial contamination.<sup>19</sup> A pulmonary artery thermodilution catheter (Edwards 7 French; Baxter Healthcare Corp., Round Lake, IL) was positioned

in the pulmonary artery *via* an introducer in the left femoral vein for the measurement of cardiac output, right atrial pressure (RAP), pulmonary artery pressure, pulmonary capillary wedge pressure, central body temperature, and collection of mixed venous blood samples.

Following identification of the right carotid bifurcation, the external carotid artery was ligated immediately distal from the bifurcation, and an ultrasonic flow probe (3.0 mm; Transonic Systems Inc., Ithaca, NY) was placed around the right common carotid artery. If there was any artery branching from the internal carotid artery between the flow probe and the base of the skull (for instance, the occipital artery), this vessel was ligated as well.

Following midline laparotomy, an ultrasonic flow probe (4.0 mm; Transonic Systems Inc.) was placed around the superior mesenteric artery for the measurement of blood flow to the splanchnic region. After location of the terminal ileum, a mesenteric vein related to the ileum was cannulated (6 French) for the collection of mesenteric venous blood samples. An antimesenteric incision was made to expose the intestinal mucosa. The urinary bladder was cannulated to prevent distension of the bladder wall and to monitor urinary production.

A  $5 \times 5$ -cm skin flap was removed from the right side of the skull. A circular piece of bone (approximately 2 cm in diameter) was removed, exposing the dura mater of the brain. The dura was opened carefully until the cortical surface of the right hemisphere was clearly visible. Continuous irrigation with warmed saline prevented the exposed tissues from desiccation.

### Hemodynamic and Blood Gas Measurements

Systolic and diastolic arterial blood pressures (millimeters of mercury), heart rate (beats per minute), RAP (millimeters of mercury), systolic and diastolic pulmonary pressures (millimeters of mercury), and pulmonary capillary wedge pressure (millimeters of mercury) were monitored. Cardiac output was measured by thermodilution and a cardiac output computer (Vigilance; Baxter Edwards Critical Care, Round Lake, IL). The average of 3 consecutive bolus injections of 5 ml of room-temperature saline was considered representative for the cardiac output at each measurement point. Blood flows in the internal carotid artery ( $\dot{Q}_{\text{ICA}}$ ) and superior mesenteric artery ( $\dot{Q}_{\text{SMA}}$ ) were measured continuously (Flow meter T206; Transonic Systems Inc.). By distal occlusion of the vessels, zero flow values were obtained, which were compared with the values measured at the end of the experiment after the animal had been killed. Hemodynamic values were indexed according to body weight. Systemic vascular resistance index, mesenteric vascular resistance index, and internal carotid vascular resistance index (all millimeters of mercury per milliliter per

**Table 1. Hemodynamic Measurements during Isovolemic Hemodilution and Hyperoxia**

|                                                                        |   | Baseline    | 20 ml        | 40 ml         | 60 ml          | 90 ml          | Hyperoxia      |
|------------------------------------------------------------------------|---|-------------|--------------|---------------|----------------|----------------|----------------|
| Ht (%)                                                                 | H | 25.3 ± 3.0  | 17.0 ± 2.1*‡ | 12.8 ± 1.3*‡‡ | 9.9 ± 1.1*‡‡   | 7.6 ± 1.2*‡‡   | 8.0 ± 1.4*‡    |
|                                                                        | C | 25.7 ± 2.8  | 25.1 ± 2.8   | 25.1 ± 1.5    | 24.9 ± 1.2     | 27.2 ± 1.4     | 26.8 ± 2.3     |
| HR (beats/min)                                                         | H | 130 ± 13‡   | 140 ± 13‡    | 139 ± 12‡     | 152 ± 15*‡     | 159 ± 10*‡     | 141 ± 11‡‡     |
|                                                                        | C | 112 ± 14    | 116 ± 16     | 119 ± 12      | 115 ± 13       | 125 ± 9        | 110 ± 12       |
| MAP (mmHg)                                                             | H | 105 ± 7     | 108 ± 7      | 105 ± 9       | 96 ± 8         | 94 ± 9         | 97 ± 8         |
|                                                                        | C | 101 ± 8     | 106 ± 8      | 107 ± 10      | 105 ± 8        | 103 ± 7        | 103 ± 8        |
| MPAP (mmHg)                                                            | H | 20 ± 3      | 21 ± 6       | 25 ± 4        | 24 ± 3         | 26 ± 6         | 25 ± 8         |
|                                                                        | C | 19 ± 7      | 21 ± 5       | 23 ± 6        | 23 ± 7         | 22 ± 4         | 20 ± 4         |
| PCWP (mmHg)                                                            | H | 10 ± 3      | 11 ± 3       | 13 ± 3        | 12 ± 3         | 13 ± 3         | 15 ± 4*        |
|                                                                        | C | 12 ± 2      | 11 ± 3       | 12 ± 3        | 12 ± 3         | 12 ± 3         | 14 ± 3         |
| SVI (ml/kg)                                                            | H | 1.8 ± 0.3   | 1.8 ± 0.3    | 2.0 ± 0.3     | 1.9 ± 0.3      | 1.9 ± 0.2      | 1.9 ± 0.2      |
|                                                                        | C | 1.8 ± 0.3   | 1.7 ± 0.3    | 1.7 ± 0.2     | 1.6 ± 0.3      | 1.5 ± 0.3      | 1.7 ± 0.3      |
| SVRI (mmHg · l <sup>-1</sup> · kg <sup>-1</sup> · min <sup>-1</sup> )  | H | 35 ± 5      | 32 ± 5‡      | 28 ± 5*‡      | 24 ± 4*‡       | 20 ± 3*‡       | 24 ± 3*‡       |
|                                                                        | C | 38 ± 5      | 41 ± 7       | 40 ± 7        | 42 ± 7         | 43 ± 8         | 44 ± 9         |
| PVRI (mmHg · l <sup>-1</sup> · kg <sup>-1</sup> · min <sup>-1</sup> )  | H | 5 ± 2       | 4 ± 1        | 5 ± 2         | 4 ± 1          | 4 ± 2          | 4 ± 2          |
|                                                                        | C | 4 ± 2       | 4 ± 2        | 4 ± 2         | 4 ± 2          | 5 ± 2          | 3 ± 2          |
| MVRI (mmHg · l <sup>-1</sup> · kg <sup>-1</sup> · min <sup>-1</sup> )  | H | 226 ± 46‡   | 236 ± 52‡    | 213 ± 42‡     | 191 ± 45‡      | 167 ± 29*‡     | 190 ± 31‡      |
|                                                                        | C | 290 ± 47    | 309 ± 35     | 324 ± 56      | 327 ± 52       | 324 ± 51       | 428 ± 35*      |
| ICVRI (mmHg · l <sup>-1</sup> · kg <sup>-1</sup> · min <sup>-1</sup> ) | H | 3,182 ± 364 | 2,511 ± 384* | 2,114 ± 374*‡ | 1,763 ± 308*‡‡ | 1,474 ± 350*‡‡ | 2,017 ± 428*‡‡ |
|                                                                        | C | 2,694 ± 508 | 2,806 ± 494  | 2,798 ± 503   | 2,939 ± 497    | 2,826 ± 429    | 3,971 ± 563*   |

Values are presented as mean ± SD.

\*  $P < 0.05$  versus baseline 1 and 2. †  $P < 0.05$  versus previous measurement. ‡  $P < 0.05$  versus control.

Ht = hematocrit; HR = heart rate; MAP = mean arterial pressure; MPAP = mean pulmonary artery pressure; PCWP = pulmonary capillary wedge pressure; SVI = stroke volume index; SVRI = systemic vascular resistance index; PVRI = pulmonary vascular resistance index; MVRI = mesenteric vascular resistance index; ICVRI = internal carotid vascular resistance index.

minute per kilogram) were calculated as follows:  $(\text{MAP} - \text{RAP})/\text{CI}$ ,  $(\text{MAP} - \text{RAP})/\dot{Q}_{\text{SMA}}$ , and  $(\text{MAP} - \text{RAP})/\dot{Q}_{\text{ICA}}$ , respectively, where MAP = mean arterial pressure.

At each measurement point, simultaneously an arterial sample was taken from the brachial artery, a mixed venous sample from the pulmonary artery catheter, a mesenteric venous sample from the mesenteric venous catheter, and a jugular venous sample from the internal jugular venous catheter. The samples were used to determine blood gas values (ABL505; Radiometer, Copenhagen, Denmark), as well as hematocrit, hemoglobin concentration, and hemoglobin oxygen saturation ( $\text{SO}_2$ ) (OSM 3; Radiometer), corrected for species.

Systemic  $\text{DO}_2$  ( $\text{DO}_{2\text{SYS}}$ ; milliliters per minute per kilogram body weight) was calculated as:

$$\text{CI} \times \text{arterial } \text{O}_2 \text{ content},$$

where CI is expressed as milliliters per minute per kilogram, and arterial oxygen content is expressed as milliliters oxygen per milliliter blood, which was calculated as:

$$((1.31 \times [\text{Hb}] \times \text{Sao}_2) + (0.003 \times \text{Pao}_2)) \times 0.01,$$

where  $\text{Pao}_2$  is arterial oxygen partial pressure and  $\text{Sao}_2$  is arterial oxygen saturation. Systemic oxygen consumption ( $\dot{V}\text{O}_{2\text{SYS}}$ ; milliliters per minute per kilogram body weight) was calculated as:

$$\text{CI} \times (\text{arterial} - \text{mixed venous } \text{O}_2 \text{ content difference}).$$

The systemic  $\text{O}_2\text{ER}$  ( $\text{O}_2\text{ER}_{\text{SYS}}$ ; percent) was calculated as:  $(\text{arterio} - \text{mixed venous } \text{O}_2 \text{ content difference})/\text{arterial } \text{O}_2 \text{ content}$ .

In a similar way, the intestinal  $\text{DO}_2$  ( $\text{DO}_{2\text{SMA}}$ ),  $\dot{V}\text{O}_2$  ( $\dot{V}\text{O}_{2\text{SMA}}$ ), and  $\text{O}_2\text{ER}$  ( $\text{O}_2\text{ER}_{\text{SMA}}$ ) were calculated. Measurement of the internal jugular venous oxygen content allowed the calculation of the arteriovenous oxygen content difference, and thereby the  $\text{O}_2\text{ER}$  of the brain<sup>20-22</sup> ( $\text{O}_2\text{ER}_{\text{ICA}}$ ) was calculated as:

$(\text{arterio} - \text{internal jugular venous } \text{O}_2 \text{ content difference})/\text{arterial } \text{O}_2 \text{ content}$ .

#### Microvascular Oxygen Partial Pressure Measurements

The  $\mu\text{Po}_2$  was measured in the cerebral cortex and the serosa and mucosa of the ileum, using the oxygen-dependent quenching of Pd-porphyrin phosphorescence. Excitation of Pd-porphyrin by a pulse of light causes emission of phosphorescence with a decay in time, which is quantitatively related to the oxygen concentration.<sup>23-25</sup> Pd-meso-tetra(4 carboxy-phenyl)porphine (Porphyrin Products, Logan, UT) is coupled to human serum albumin to form a large molecular complex that, when injected intravenously, is confined mainly to the vascular compartment.<sup>25,26</sup> Fifty milliliters of a 4-mm Pd-porphyrin solution was administered, corresponding with a dosage of 12 mg/kg bodyweight. The  $\mu\text{Po}_2$  measurements were made with optical fibers for the trans-



Fig. 1. Systemic blood flow and oxygenation parameters after 20, 40, 60, and 90 ml/kg hemodilution (with hematocrit values) and consequent hyperoxic ventilation (HO, beyond dotted line) in 10 anesthetized pigs (HD) and at corresponding time points in 5 control animals (Co). Cardiac index (CI) increased during hemodilution. Systemic oxygen delivery ( $\text{DO}_{2\text{SYS}}$ ) decreased with the onset of hemodilution, whereas the systemic oxygen consumption ( $\text{VO}_{2\text{SYS}}$ ) decreased after the final hemodilution step. Systemic oxygen extraction ratio ( $\text{O}_{2\text{ER}_{\text{SYS}}}$ ) increased significantly. Hyperoxia had no significant effect on these parameters. Values represent mean  $\pm$  SD. \* $P < 0.05$  HD versus Co;  $\circ P < 0.05$  HD versus baseline;  $\blacklozenge P < 0.05$  HD versus previous.

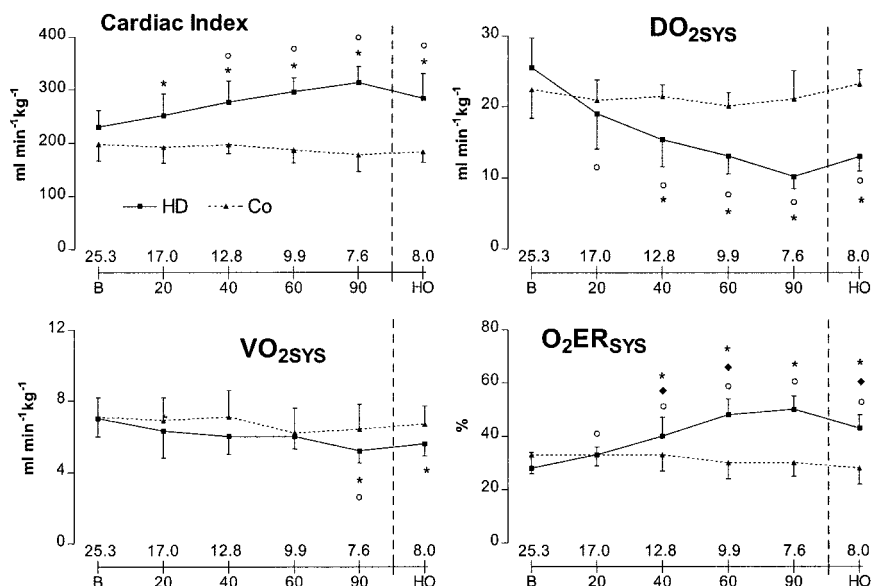

mission of excitation and emission light, attached to a phosphorimeter. To determine which microvascular compartment is measured by fiber phosphorimetry, the Pd-porphyrin phosphorescence fiber technique has been compared with a microscopic phosphorimeter: simultaneous  $\text{Po}_2$  measurements with the fiberoptic technique showed excellent correlation with microscopically measured  $\text{Po}_2$  in capillaries and first-order venules, but not with arteriolar or venous  $\text{Po}_2$  values, at different  $\text{FiO}_2$  levels.<sup>27</sup> Thus, this result allowed us to term the fiberoptic measurement of  $\text{Po}_2$  as the measurement of  $\mu\text{Po}_2$ . Fiberoptic measurements of  $\mu\text{Po}_2$  incorporate blood vessels over an area of approximately  $1 \text{ cm}^2$  with a penetration depth of approximately  $0.5 \text{ mm}$ .<sup>17,25</sup> As the calibration constants in the calculation of the  $\mu\text{Po}_2$  from the phosphorescence decay time are temperature dependent, intestinal surface temperature measurements were used for correction of these constants. In the present study, a multifiber phosphorimeter was used, with three separately operated optical fibers. The fibers were placed near the surfaces of the cerebral cortex and the serosa and mucosa of the ileum. In this way, the  $\mu\text{Po}_2$  was measured in three different regions simultaneously.

#### Experimental Procedure

After preparation and a stabilization period of at least 30 min, two baseline measurements were made during a 1-h period. The animals were randomized between a hemodilution group ( $n = 10$ ) and a time-matched control group ( $n = 5$ ). Stepwise isovolemic hemodilution was accomplished by withdrawal of blood from the femoral artery and simultaneous administration of an equal volume of HAES-steril 6% (6% hydroxyethylstarch, degree of substitution 0.5, in 0.9% NaCl solution, Mw 200,000; Fresenius, Germany) through the femoral vein

at the same rate. Four dilution steps were made: three steps of 20 ml/kg bodyweight and a final step of 30 ml/kg, resulting in a total volume exchange of 90 ml/kg. Twenty minutes after each hemodilution step, all hemodynamic, blood gas, and  $\mu\text{Po}_2$  measurements were repeated. Lactate measurements were performed at baseline and after a total volume exchange of 40 and 90 ml/kg. Following the measurements after the final hemodilution step,  $\text{FiO}_2$  was increased to 1.0, and after 20 min stabilization, all measurements were repeated. In the control group, identical measurements were made at corresponding time intervals, but no hemodilution was performed. In the final stage of the experiment, the  $\text{FiO}_2$  was increased to 1.0. All experiments were terminated by administration of 30 mmol of potassium chloride.

#### Statistical Analysis

Values are reported as mean  $\pm$  SD. Because the consecutive baseline measurements were not significantly different for any parameter, they were averaged and presented as a single data point. Intragroup differences were analyzed using analysis of variance for repeated measurements. When appropriate, *post hoc* analyses were performed with the Student-Newman-Keuls test. Intergroup differences for each measurement point were analyzed with the unpaired *t* test; Bonferroni correction for multiple comparisons was used. *P* values  $< 0.05$  were considered significant. A critical level of hemodilution was determined for the whole body  $\dot{V}\text{O}_2$  and the  $\mu\text{Po}_2$  of the intestinal serosa and mucosa and the cerebral cortex. From plots of hematocrit against  $\dot{V}\text{O}_{2\text{SYS}}$  and  $\mu\text{Po}_2$ , it was possible to determine the points at which  $\dot{V}\text{O}_2$  or  $\mu\text{Po}_2$  became dependent on the hematocrit with further hemodilution. These points were determined for each animal separately by the intersection of

**Table 2. Systemic Blood Gas and Lactate Measurements during Isovolemic Hemodilution and Hyperoxia**

|                          |   | Baseline    | 20 ml         | 40 ml        | 60 ml        | 90 ml        | Hyperoxia     |
|--------------------------|---|-------------|---------------|--------------|--------------|--------------|---------------|
| Ht (%)                   | H | 25.3 ± 3.0  | 17.0 ± 2.1*†‡ | 12.8 ± .3*†‡ | 9.9 ± 1.1*†‡ | 7.6 ± 1.2*†‡ | 8.0 ± 1.4*†‡  |
|                          | C | 25.7 ± 2.8  | 25.1 ± 2.8    | 25.1 ± 1.5   | 24.9 ± 1.2   | 27.2 ± 1.4   | 26.8 ± 2.3    |
| Hb (g/dl)                | H | 8.1 ± 1.0   | 5.4 ± 0.7*    | 3.9 ± 0.7*†  | 3.0 ± 0.4*†  | 2.2 ± 0.2*†  | 2.4 ± 0.5*    |
|                          | C | 8.3 ± 0.9   | 8.1 ± 0.9     | 8.1 ± 0.5    | 8.0 ± 0.4    | 8.8 ± 0.6    | 8.6 ± 0.8     |
| Sao <sub>2</sub> (%)     | H | 99.5 ± 0.5  | 99.5 ± 0.5    | 99.2 ± 0.4   | 99.7 ± 0.5   | 99.4 ± 0.5   | 99.9 ± 0.3    |
|                          | C | 99.4 ± 1.0  | 99.6 ± 0.5    | 99.0 ± 0.7   | 99.0 ± 0.2   | 99.0 ± 0.7   | 100 ± 0.0     |
| Pao <sub>2</sub> (mm Hg) | H | 166 ± 14    | 175 ± 10      | 169 ± 18     | 172 ± 12     | 162 ± 16     | 499 ± 44*†‡   |
|                          | C | 173 ± 9     | 180 ± 8       | 177 ± 9      | 174 ± 8      | 171 ± 10     | 568 ± 25*†    |
| Cao <sub>2</sub> (ml/dl) | H | 11.0 ± 1.4  | 7.5 ± 0.9*†   | 5.5 ± 0.7*†‡ | 4.4 ± 0.7*†‡ | 3.4 ± 0.3*†‡ | 4.7 ± 0.5*†‡  |
|                          | C | 10.9 ± 1.1  | 11.1 ± 1.2    | 11.0 ± 0.6   | 10.9 ± 0.4   | 11.9 ± 0.6   | 13.0 ± 0.9*†  |
| Paco <sub>2</sub> (mmHg) | H | 37 ± 3      | 36 ± 4        | 38 ± 2       | 37 ± 3       | 39 ± 3       | 41 ± 5        |
|                          | C | 37 ± 2      | 38 ± 5        | 39 ± 2       | 37 ± 3       | 40 ± 3       | 36 ± 2        |
| pHa                      | H | 7.48 ± 0.03 | 7.49 ± 0.03   | 7.47 ± 0.03  | 7.46 ± 0.03  | 7.44 ± 0.03* | 7.43 ± 0.06*  |
|                          | C | 7.49 ± 0.03 | 7.48 ± 0.03   | 7.48 ± 0.03  | 7.48 ± 0.05  | 7.45 ± 0.04  | 7.51 ± 0.04†  |
| Lac art (mm)             | H | 1.38 ± 0.21 | —             | 1.30 ± 0.18† | —            | 1.66 ± 0.31  | 1.58 ± 0.29   |
|                          | C | 1.54 ± 0.25 | —             | 1.63 ± 0.21  | —            | 1.31 ± 0.29  | 1.40 ± 0.31   |
| SvO <sub>2</sub> (%)     | H | 73 ± 6      | 69 ± 8        | 63 ± 8*†     | 54 ± 9*†‡    | 52 ± 9*†     | 80 ± 7*†      |
|                          | C | 69 ± 7      | 69 ± 4        | 68 ± 6       | 71 ± 6       | 71 ± 5       | 81 ± 6*†      |
| PvO <sub>2</sub> (mmHg)  | H | 48 ± 5      | 44 ± 3        | 40 ± 4*†‡    | 37 ± 3*†     | 37 ± 3*†     | 54 ± 6*†      |
|                          | C | 44 ± 4      | 45 ± 3        | 45 ± 4       | 46 ± 4       | 46 ± 4       | 55 ± 8        |
| pHv                      | H | 7.44 ± 0.04 | 7.43 ± 0.03   | 7.42 ± 0.04  | 7.40 ± 0.04  | 7.38 ± 0.03  | 7.36 ± 0.06*† |
|                          | C | 7.45 ± 0.03 | 7.44 ± 0.03   | 7.44 ± 0.03  | 7.43 ± 0.04  | 7.42 ± 0.04  | 7.46 ± 0.05   |
| Lac mix (mm)             | H | 1.37 ± 0.28 | —             | 1.44 ± 0.27  | —            | 1.80 ± 0.36  | 1.57 ± 0.37   |
|                          | C | 1.60 ± 0.21 | —             | 1.65 ± 0.29  | —            | 1.47 ± 0.16  | 1.39 ± 0.22   |

Values are presented as mean ± SD.

\*  $P < 0.05$  versus baseline 1 and 2. †  $P < 0.05$  versus previous measurement. ‡  $P < 0.05$  versus control.

Ht = hematocrit; Hb = hemoglobin; Sao<sub>2</sub> = arterial O<sub>2</sub> saturation; Pao<sub>2</sub> = arterial tension O<sub>2</sub>; Cao<sub>2</sub> = arterial O<sub>2</sub> content; Paco<sub>2</sub> = arterial partial pressure of CO<sub>2</sub>; pHa = arterial pH; Lac art = arterial lactate concentration; SvO<sub>2</sub> = mixed venous O<sub>2</sub> saturation; PvO<sub>2</sub> = mixed venous partial pressure of O<sub>2</sub>; pHv = mixed venous pH; Lac mix = mixed venous lactate concentration.

the two best-fit regression lines, as determined by a least sum of squares technique.

## Results

### Systemic and Pulmonary Hemodynamics

Because of the type of measurements, muscle relaxation was necessary throughout the experimental protocol. To ensure that the anesthetic regimen was sound, one separate time-matched sham-operated animal was anesthetized without the use of muscle relaxants. Throughout the experiment, the animal did not try to escape or move purposefully. Only slight shivering was observed 150 min after start of anesthesia. All hemodynamic parameters remained stable as in all control group animals. All hemodynamics of the study animals are summarized in table 1.

Baseline measurements in the hemodilution and the control groups were not significantly different, except for the heart rate, which was lower in the control group. In the control animals, all systemic hemodynamic parameters remained constant throughout the experiment. In the hemodilution group, the decrease in hematocrit, from  $25.3 \pm 3.0$  at baseline to  $7.6 \pm 1.2\%$  after exchange of 90 ml/kg, was accompanied by an increase in cardiac index (CI; fig. 1). Heart rate increased significantly, whereas stroke volume did not change from baseline values. MAP remained constant during hemodilution,

although the systemic vascular resistance index decreased significantly compared with baseline and control group values. The pulmonary artery pressure, vascular resistance index, and pulmonary capillary wedge pressure did not change significantly during hemodilution.

Hyperoxia decreased the heart rate to the range of baseline values, resulting in a slight but not significant decrease in CI. In addition, the pulmonary capillary wedge pressure and the systemic vascular resistance index increased after hyperoxia.

### Systemic Oxygenation

Data are summarized in table 2 and figure 1. Despite the increase in CI, DO<sub>2SYS</sub> decreased with the onset of hemodilution. The O<sub>2ER</sub><sub>SYS</sub> increased, and as a result the  $\dot{V}O_{2SYS}$  was preserved through a hematocrit of 9.9% but decreased significantly after the final hemodilution step at a hematocrit of 7.6%. Consequently, the mixed venous Po<sub>2</sub> and So<sub>2</sub> decreased with progressive hemodilution.

Following the final dilution step, hyperoxia significantly increased the arterial oxygen content in the hemodilution group from  $3.4 \pm 0.3$  to  $4.7 \pm 0.5$  ml/dl. This did not change DO<sub>2SYS</sub>, despite the decrease in CI. The O<sub>2ER</sub><sub>SYS</sub> decreased significantly following hyperoxia, and  $\dot{V}O_{2SYS}$  was not restored. Mixed venous Po<sub>2</sub> and So<sub>2</sub> increased above baseline values ( $P < 0.05$ ). In the control group, the arterial oxygen content was increased by hyperoxia as well. However, this did not change the

Fig. 2. Intestinal blood flow and oxygenation parameters after 20, 40, 60, and 90 ml/kg hemodilution (with hematocrit values) and consequent hyperoxic ventilation (HO, beyond dotted line) in 10 anesthetized pigs (HD) and at corresponding time points in 5 control animals (Co). Superior mesenteric artery blood flow ( $\dot{Q}_{SMA}$ ) did not change during hemodilution. Superior mesenteric artery oxygen delivery ( $DO_{2SMA}$ ) decreased with the onset of hemodilution;  $\dot{V}O_{2SMA}$  decreased after the third hemodilution step. Superior mesenteric artery oxygen extraction ratio ( $O_{2ER_{SMA}}$ ) increased progressively during the experiment. Hyperoxia significantly decreased  $\dot{Q}_{SMA}$  and  $DO_{2SMA}$  in the control group and  $O_{2ER_{SMA}}$  in the hemodilution group. Values represent mean  $\pm$  SD. \* $P < 0.05$  HD versus Co;  $\circ P < 0.05$  HD versus baseline;  $\blacklozenge P < 0.05$  HD versus previous.

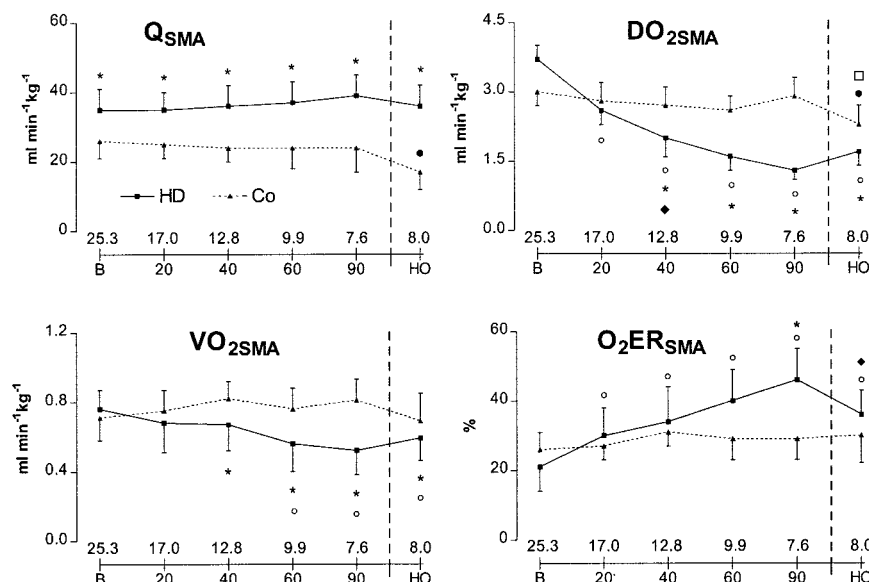

$DO_{2SYS}$  and  $\dot{V}O_{2SYS}$ , although mixed venous  $PO_2$  and  $SO_2$  exceeded baseline values.

#### Regional Blood Flow and Oxygenation

Although all animals underwent the same surgical and anesthetic protocols and were randomly assigned to the hemodilution or the control group, mesenteric blood flow ( $\dot{Q}_{SMA}$ ) in the control group was lower (fig. 2) compared with the hemodilution group. All control group parameters remained constant. Hemodilution did not change  $\dot{Q}_{SMA}$ , resulting in a progressive decrease in  $DO_{2SMA}$ . After exchange of 60 ml/kg (corresponding hematocrit, 9.9%),  $\dot{V}O_{2SMA}$  was decreased from baseline, whereas  $O_{2ER_{SMA}}$  increased from  $21 \pm 7\%$  at baseline to  $46 \pm 9\%$  after the final hemodilution step (fig. 2).

Baseline values for the carotid blood flow ( $\dot{Q}_{ICA}$ ; fig. 3) and the corresponding vascular resistance (table 1) were comparable for both groups.  $\dot{Q}_{ICA}$  increased from  $2.5 \pm 0.5 \text{ ml} \cdot \text{min}^{-1} \cdot \text{kg}^{-1}$  at baseline to  $4.2 \pm 0.6 \text{ ml} \cdot \text{min}^{-1} \cdot \text{kg}^{-1}$  after exchange of 90 ml/kg (fig. 3). Internal jugular

venous  $PO_2$  (fig. 4) and  $SO_2$  (table 3) decreased during hemodilution, reflecting the increase in  $O_{2ER_{ICA}}$  (from  $30 \pm 6\%$  at baseline to  $47 \pm 6\%$  at 90-ml/kg exchange; fig. 3). Mesenteric venous  $PO_2$  (fig. 4) and  $SO_2$  values (table 3) decreased in a similar way.

Hyperoxia did not influence  $\dot{Q}_{SMA}$  after hemodilution. The  $DO_{2SMA}$  increased slightly but not significantly, and  $\dot{V}O_{2SMA}$  did not improve. Mesenteric venous  $PO_2$  and  $SO_2$  increased substantially following hyperoxia; the  $PO_2$  even exceeded baseline values. In the control group, however, the mesenteric vascular resistance index increased after hyperoxia and the  $\dot{Q}_{SMA}$  decreased, resulting in a decrease in  $DO_{2SMA}$  but not in  $\dot{V}O_{2SMA}$ . The change in  $O_{2ER_{SMA}}$  was not statistically significant, and the mesenteric venous  $PO_2$  and  $SO_2$  did not significantly increase after hyperoxia in the control group.

Hyperoxia decreased the  $\dot{Q}_{ICA}$  significantly in the hemodilution and the control groups.  $PO_2$  and  $SO_2$  in the internal jugular vein in the hemodilution group exceeded baseline values, whereas they did not change in the control group.

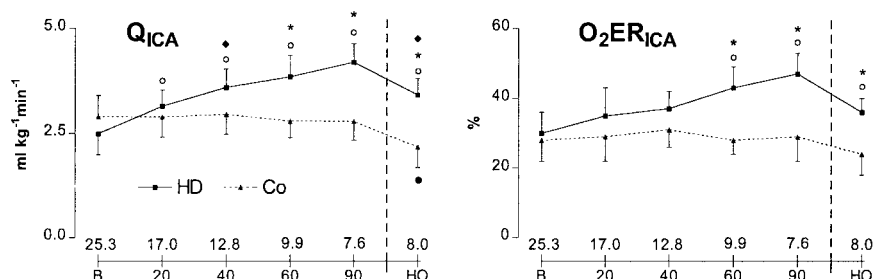

Fig. 3. Internal carotid artery blood flow ( $\dot{Q}_{ICA}$ ) and cerebral oxygen extraction ratio ( $O_{2ER_{ICA}}$ ) after 20, 40, 60, and 90 ml/kg hemodilution (with hematocrit values) and consequent hyperoxic ventilation (HO, beyond dotted line) in 10 anesthetized pigs (HD) and at corresponding time points in 5 control animals (Co).  $\dot{Q}_{ICA}$  increased after the first hemodilution step,  $O_{2ER_{ICA}}$  after the third hemodilution step. Hyperoxia had no significant effect on these parameters. Values represent mean  $\pm$  SD. \* $P < 0.05$  HD versus Co;  $\circ P < 0.05$  HD versus baseline;  $\blacklozenge P < 0.05$  HD versus previous.

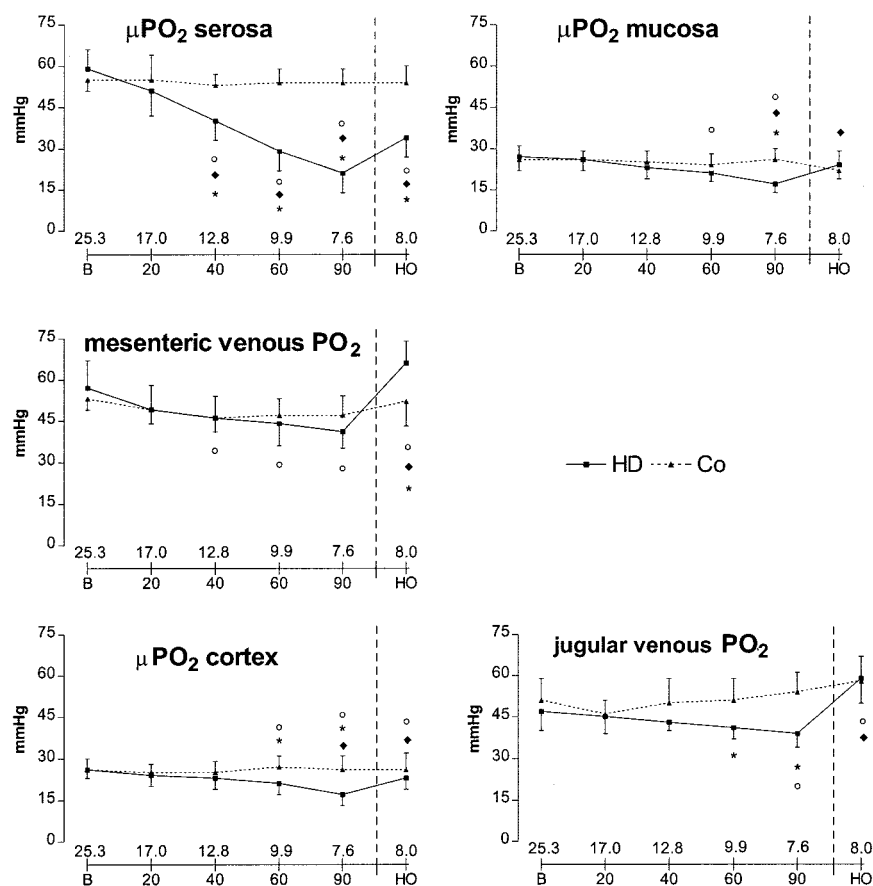

Fig. 4. Intestinal serosal and mucosal, and cerebral cortex microvascular oxygen partial pressure ( $\mu\text{PO}_2$ ) and mesenteric and jugular venous  $\text{Po}_2$  values after 20, 40, 60, and 90 ml/kg hemodilution (with hematocrit values) and consequent hyperoxic ventilation (HO, beyond dotted line) in 10 anesthetized pigs (HD) and at corresponding time points in 5 control animals (Co). Serosal  $\mu\text{PO}_2$  decreased significantly after the second hemodilution step, whereas the mucosal  $\mu\text{PO}_2$  fell after 60 ml/kg blood exchange. Mesenteric venous  $\text{Po}_2$  decreased throughout the complete hemodilution procedure. Cerebral  $\mu\text{PO}_2$  decreased significantly after the third hemodilution step, similar to the internal jugular venous  $\text{Po}_2$ . Hyperoxia increased all  $\mu\text{PO}_2$  values and raised the venous  $\text{Po}_2$  above baseline levels in the hemodilution group but had no significant effect on these parameters in the control group. Values represent mean  $\pm$  SD. \* $P < 0.05$  HD versus Co;  $\circ P < 0.05$  HD versus baseline;  $\blacklozenge P < 0.05$  HD versus previous.

### Microvascular Oxygen Partial Pressure Measurements

Microvascular and regional venous  $\text{Po}_2$  measurements are shown in figure 4. Baseline measurements were similar for the hemodilution and the control groups. The  $\mu\text{PO}_2$  of the serosa ( $59 \pm 7$  mmHg at baseline) decreased at the second hemodilution step and fell to  $21 \pm 7$  mmHg after the last step (hematocrit,  $7.6 \pm 1.2\%$ ). The

mucosal  $\mu\text{PO}_2$  ( $27 \pm 4$  mmHg at baseline) remained unaffected for a longer period of time and was decreased after the third hemodilution step (hematocrit,  $9.9 \pm 1.1\%$ ). The  $\mu\text{PO}_2$  of the cerebral cortex ( $26 \pm 3$  mmHg at baseline) demonstrated a similar behavior as the mucosal  $\mu\text{PO}_2$  and was also decreased after the third hemodilution step.  $\mu\text{PO}_2$  measurements in the control groups did not change in time.

Table 3. Regional Venous Blood Gas and Lactate Measurements during Hemodilution and Hyperoxia

|                       |   | Baseline 1      | 20 ml                     | 40 ml                             | 60 ml                           | 90 ml                           | Hyperoxia                  |
|-----------------------|---|-----------------|---------------------------|-----------------------------------|---------------------------------|---------------------------------|----------------------------|
| Ht (%)                | H | $25.3 \pm 3.0$  | $17.0 \pm 2.1^{*\dagger}$ | $12.8 \pm 1.3^{*\dagger\dagger}$  | $9.9 \pm 1.1^{*\dagger\dagger}$ | $7.6 \pm 1.2^{*\dagger\dagger}$ | $8.0 \pm 1.4^{*\dagger}$   |
|                       | C | $25.7 \pm 2.8$  | $25.1 \pm 2.8$            | $25.1 \pm 1.5$                    | $24.9 \pm 1.2$                  | $27.2 \pm 1.4$                  | $26.8 \pm 2.3$             |
| SmvO <sub>2</sub> (%) | H | $80 \pm 8$      | $74 \pm 9$                | $69 \pm 9^*$                      | $64 \pm 10^*$                   | $58 \pm 9^*$                    | $84 \pm 9^\dagger$         |
|                       | C | $76 \pm 6$      | $73 \pm 6$                | $70 \pm 4$                        | $72 \pm 5$                      | $72 \pm 6$                      | $78 \pm 8$                 |
| pHmv                  | H | $7.45 \pm 0.03$ | $7.43 \pm 0.03$           | $7.40 \pm 0.03^{*\dagger\dagger}$ | $7.39 \pm 0.03^*$               | $7.35 \pm 0.04^{*\dagger}$      | $7.35 \pm 0.04^{*\dagger}$ |
|                       | C | $7.45 \pm 0.03$ | $7.43 \pm 0.01$           | $7.42 \pm 0.01$                   | $7.42 \pm 0.02$                 | $7.41 \pm 0.02$                 | $7.43 \pm 0.02$            |
| Lac mes (mm)          | H | $1.80 \pm 0.25$ | —                         | $1.55 \pm 0.41$                   | —                               | $1.50 \pm 0.47$                 | $1.46 \pm 0.46$            |
|                       | C | $1.72 \pm 0.36$ | —                         | $1.67 \pm 0.38$                   | —                               | $1.51 \pm 0.32$                 | $1.50 \pm 0.31$            |
| SjvO <sub>2</sub> (%) | H | $70 \pm 10$     | $66 \pm 8$                | $66 \pm 6$                        | $61 \pm 8$                      | $57 \pm 8^*$                    | $83 \pm 9^\dagger$         |
|                       | C | $73 \pm 6$      | $68 \pm 4$                | $70 \pm 5$                        | $70 \pm 6$                      | $73 \pm 9$                      | $80 \pm 5$                 |
| pHjv                  | H | $7.42 \pm 0.04$ | $7.42 \pm 0.03$           | $7.40 \pm 0.02$                   | $7.37 \pm 0.03^*$               | $7.35 \pm 0.04^*$               | $7.34 \pm 0.05^*$          |
|                       | C | $7.44 \pm 0.04$ | $7.42 \pm 0.02$           | $7.43 \pm 0.01$                   | $7.42 \pm 0.02$                 | $7.41 \pm 0.02$                 | $7.44 \pm 0.02$            |
| Lac jug (mm)          | H | $2.19 \pm 0.43$ | —                         | $2.15 \pm 0.41$                   | —                               | $2.39 \pm 0.46$                 | $2.40 \pm 0.46$            |
|                       | C | $2.16 \pm 0.41$ | —                         | $2.44 \pm 0.48$                   | —                               | $2.03 \pm 0.49$                 | $1.88 \pm 0.39$            |

Values are presented as mean  $\pm$  SD.

\* $P < 0.05$  versus baseline 1 and 2.  $\dagger P < 0.05$  versus previous measurement.  $\ddagger P < 0.05$  versus control.

Ht = hematocrit; SmvO<sub>2</sub> = mesenteric venous O<sub>2</sub> saturation; pHmv = mesenteric venous pH; Lac mes = mesenteric venous lactate concentration; SjvO<sub>2</sub> = jugular venous O<sub>2</sub> saturation; pHjv = jugular venous pH; Lac jug = jugular venous lactate concentration.

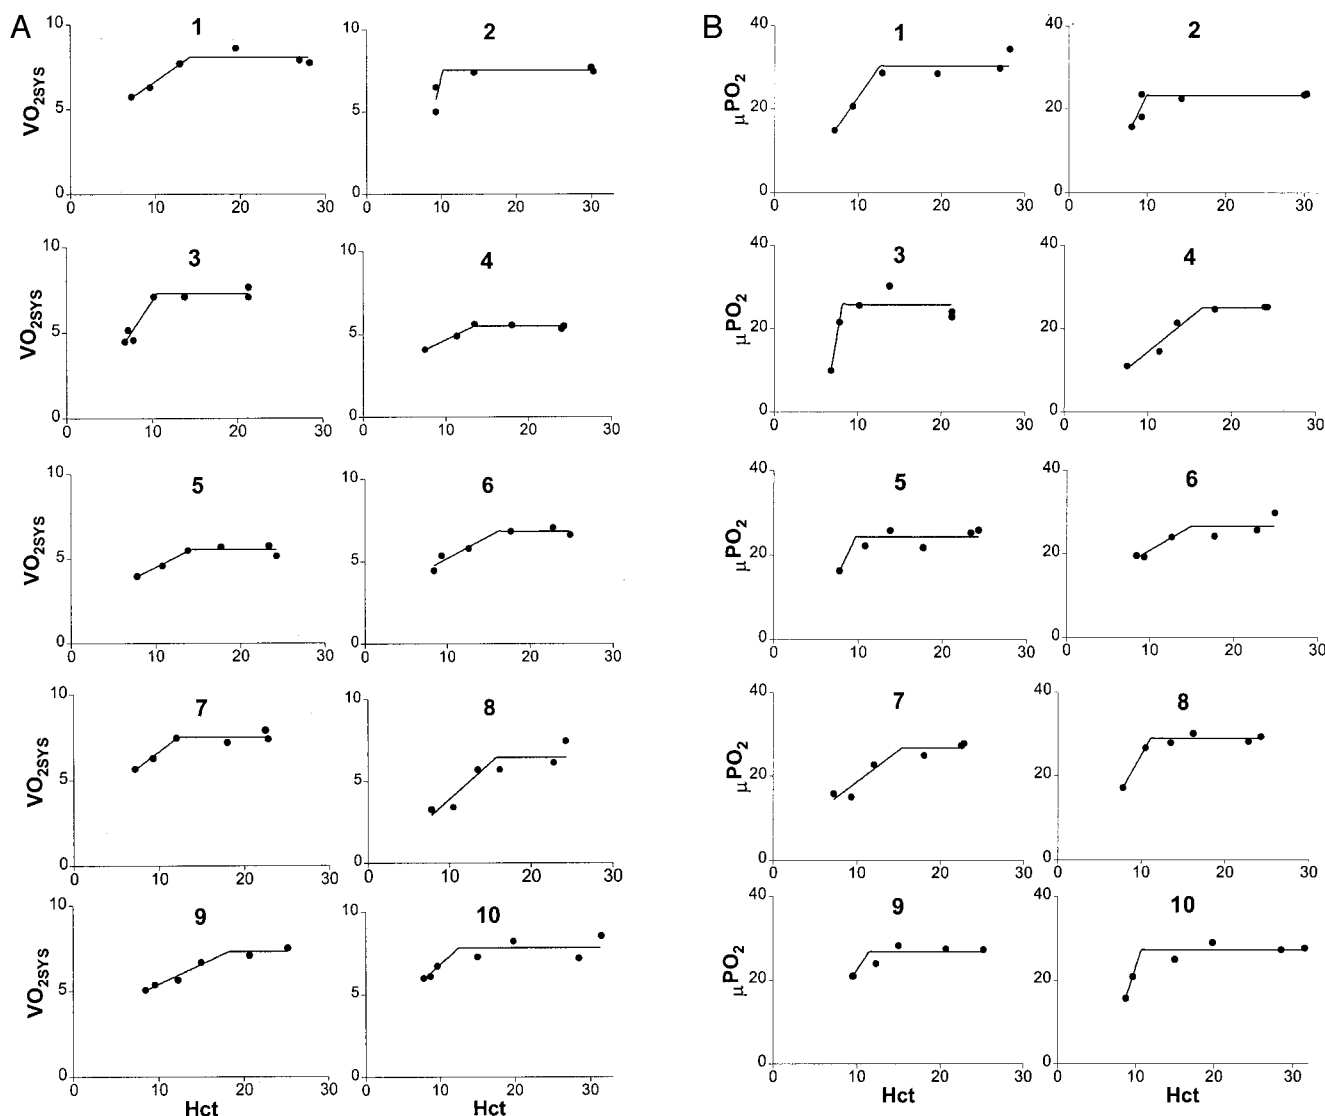

Fig. 5. (A) Critical levels of hemodilution for the systemic oxygen consumption ( $\dot{V}_{O_2}$ ), calculated for the hematocrit. The critical values were determined for each animal separately, resulting in an average critical hematocrit of  $13.7 \pm 3.5\%$ . (B) Critical levels of hemodilution for the mucosal microvascular oxygen partial pressure ( $\mu PO_2$ ), calculated for the hematocrit. The critical values were determined for each animal separately, resulting in an average critical hematocrit of  $11.4 \pm 2.6\%$ . (C) Critical levels of hemodilution for the serosal  $\mu PO_2$ , calculated for the hematocrit. The critical values were determined for each animal separately, resulting in an average critical hematocrit of  $16.9 \pm 4.2\%$ , which was significantly higher than the critical hematocrit values of the mucosal and cerebral  $\mu PO_2$  and systemic  $\dot{V}_{O_2}$ . (D) Critical levels of hemodilution for the cerebral cortex  $\mu PO_2$ , calculated for the hematocrit. The critical values were determined for each animal separately, resulting in an average critical hematocrit of  $12.1 \pm 3.1\%$ .

In the hemodilution group, hyperoxia increased both the serosal and the mucosal  $\mu PO_2$ ; the mucosal  $\mu PO_2$  was even restored to baseline values. The cerebral cortex  $\mu PO_2$  was also significantly increased but did not return to baseline values. Hyperoxia had no significant effect in the control group.

#### Critical Levels of Hemodilution

The critical hematocrit levels for the systemic  $\dot{V}_{O_2}$  and intestinal and cerebral  $\mu PO_2$  measurements are shown in figure 5.  $\dot{V}_{O_{2SYS}}$  (fig. 5A) started to decrease with he-

modilution at an average hematocrit of  $13.7 \pm 3.5\%$ . In the intestines, the critical hematocrit for the intestinal mucosa (fig. 5B) was  $11.4 \pm 2.6\%$ , whereas the serosal  $\mu PO_2$  (fig. 5C) started to decrease with hematocrit already at an average value of  $16.9 \pm 4.2$ . The  $\mu PO_2$  in the cerebral cortex (fig. 5D) displayed a similar behavior as the intestinal mucosa and  $\dot{V}_{O_{2SYS}}$  and started to decrease with hematocrit at an average value of  $12.1 \pm 3.1\%$ . The critical hematocrit values for the mucosal and cerebral  $\mu PO_2$  and  $\dot{V}_{O_{2SYS}}$  were not significantly different; compared with the serosal  $\mu PO_2$ , the critical hematocrit of the latter was found to be significantly higher.



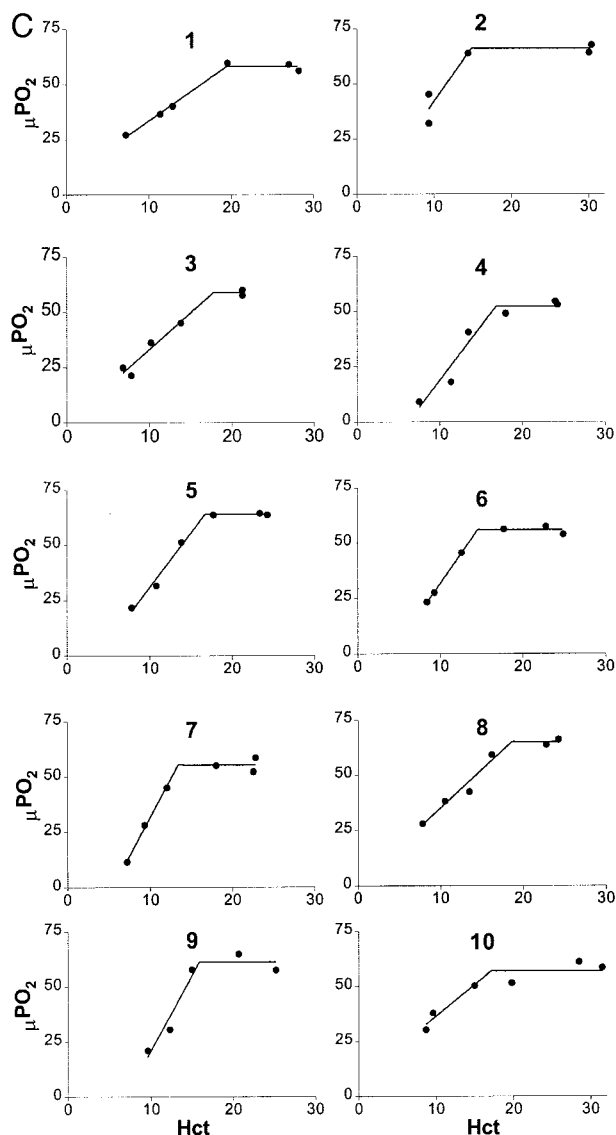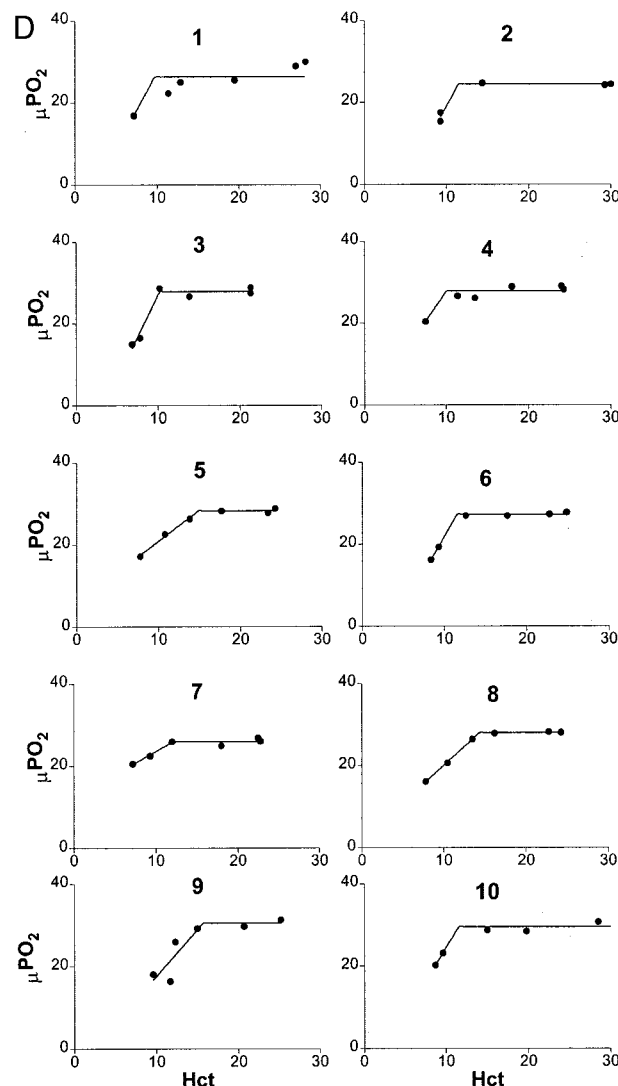

### Metabolic Parameters

Systemic and regional parameters are summarized in tables 2 and 3, respectively. Arterial carbon dioxide partial pressure did not change during the entire experiment in the hemodilution and the control groups. The systemic and regional venous *pH* measurements did not change in the control group. In the hemodilution group, the arterial *pH* decreased significantly after the final hemodilution step. The mixed venous *pH* did not change, but the mesenteric venous *pH* decreased after the second step and the jugular venous *pH* after the third step. There was no significant change in systemic and regional lactate levels during hemodilution.

### Discussion

The main finding of this study is that the systemic  $\dot{V}O_2$ , the cerebral  $\mu PO_2$ , and the intestinal mucosal  $\mu PO_2$  became impaired at the same stage during hemodilution,

whereas the intestinal serosal  $\mu PO_2$  became impaired at an earlier stage. The systemic response to the decreased arterial oxygen content consisted of an increase in CI and an increase in  $O_2ER_{SYS}$ . At a regional level, the increased CI was redistributed in favor of other organ systems than the intestines, as  $\dot{Q}_{SMA}$  remained constant. Despite the redistribution of blood flow, systemic as well as intestinal  $\dot{V}O_2$  became impaired by the diminished oxygen supply at the same level of hemodilution. Although systemic redistribution may have favored the oxygenation of, for instance, the brain, the intestines successfully compensated for the diminished  $DO_2$  by a larger increase in the oxygen extraction from the blood: 130% increase for the intestinal *versus* 52% for the cerebral  $O_2ER$  from baseline to the final hemodilution step. An increase in  $O_2ER$  as the predominant mechanism for the preservation of intestinal  $\dot{V}O_2$  has been reported in previous studies as well.<sup>1,12,28</sup> Finally, a level of hemodilution was reached below which all compensatory

mechanisms became insufficient, resulting in a general critical level of hemodilution for the whole body, the intestinal mucosa, and the cerebral cortex.

Redistribution of a diminished oxygen supply in favor of organ systems with a lower oxygen extraction capacity can increase the efficiency of  $\text{Do}_2$ .<sup>29</sup> However, the mechanisms behind the redistribution of blood flow during hemodilution are not clear. The results of the present study demonstrated the functional consequences of redistribution and only allow for speculations to be made regarding regulatory mechanisms. Possible mechanisms that could account for systemic or local redistribution could include increased sympathetic activity,<sup>30–32</sup> although the level of circulating catecholamines does not increase during hemodilution.<sup>8</sup> On the other hand, activity of nitric oxide might play an important role in the systemic and splanchnic response to hemodilution.<sup>33–35</sup> An increase in cerebral blood flow during hemodilution has been attributed to decreases in arterial oxygen concentration and blood viscosity<sup>36–38</sup>; increased nitric oxide activity should not be involved in this process.<sup>39</sup>

Although the  $\dot{V}_{\text{O}_{2\text{SMA}}}$  and the mucosal  $\mu\text{Po}_2$  were preserved until a hematocrit of  $\pm 11.0\%$ , the serosal  $\mu\text{Po}_2$  started to decline at a hematocrit of  $17.0\%$  ( $P < 0.05$ ). This finding implies that the mucosa contains the predominant oxygen-consuming part of the intestinal wall and is in agreement with the oxygen electrode measurements of Haisjackl *et al.*<sup>14</sup> during hemodilution. Being the site for absorption and secretion in the gastrointestinal tract and the barrier to microbial invasion from the intestinal lumen, the gut mucosa can be expected to have a greater oxygen demand than the serosa. To preserve these important functions during conditions of diminished oxygen supply, it is not unlikely that during hemodilution the diminished intestinal oxygen supply was redistributed in favor of the mucosa.<sup>14,35</sup> A redistribution of intraorgan blood flow during hemodilution has been shown to occur in the heart<sup>8,40,41</sup> and the kidney.<sup>8</sup>

In the present study, systemic and regional oxygenation became impaired in the hematocrit range of 10–15%, which is in agreement with critical values in previous studies.<sup>2,4,6</sup> In addition, the constant regional and systemic lactate concentrations in the present study point at adequate tissue oxygenation until this level of hemodilution,<sup>42</sup> to which is contributed by the values of the regional intestinal carbon dioxide partial pressure. At the lowest hematocrit levels, only the decreased pH values indicated that tissue oxygenation was impaired, although systemic or regional acidosis did not occur. Considering critical levels of hemodilution in general, it must be noted that anesthetized animals respond differently to hemodilution as compared with conscious animals. Although not supported by the results of the present study, in anesthetized animals cardiac output increased mainly because of an increase in stroke volume,

whereas in conscious animals the increased cardiac output was attributable to an increment in heart rate.<sup>43</sup> The influence of anesthesia is emphasized by studies in which a critical level of  $\text{Do}_2$  could not be demonstrated during hemodilution in conscious animals and humans.<sup>44–46</sup>

The increase in  $\text{FiO}_2$  did not improve systemic or intestinal  $\dot{V}_{\text{O}_2}$  despite an increase in arterial oxygen content in the hemodilution and the control groups. Furthermore, it was found that only at low hematocrit levels did hyperoxia increase the regional venous  $\text{Po}_2$  values far more than the  $\mu\text{Po}_2$  values, indicating that in combination with severe hemodilution, the increased amount of physically dissolved oxygen was being shunted to the venous side of the organ vascular beds. It can be hypothesized that an interaction between the physiologic responses to hemodilution (e.g., increased capillary density and blood flow) on the one hand and hyperoxia (reduced capillary density and blood flow<sup>47</sup>) on the other hand resulted in at least a partial diversion of the dissolved oxygen away from the microcirculation.

In conclusion, similar critical levels of hemodilution were found for  $\dot{V}_{\text{O}_{2\text{SYS}}}$  and the cerebral and intestinal mucosal  $\mu\text{Po}_2$ , whereas the intestinal  $\text{O}_2\text{ER}$  increased to a greater extent than the cerebral  $\text{O}_2\text{ER}$ , indicating that during hemodilution the diminished oxygen supply was efficiently redistributed in favor of the organs with a lower capacity to increase oxygen extraction. The serosal  $\mu\text{Po}_2$  decreased at an earlier stage than the mucosal  $\mu\text{Po}_2$ , suggesting that the decreased intestinal oxygen supply was redistributed within the intestinal wall during hemodilution. During oxygen supply dependency, hyperoxic ventilation did not improve systemic or regional  $\dot{V}_{\text{O}_2}$ . The increased regional venous  $\text{Po}_2$  values in combination with the decreased  $\text{O}_2\text{ER}$  indicate that the increased amount of physically dissolved oxygen was shunted to the venous side of the organ vascular beds during severe hemodilution.

## References

1. Van der Linden P, Schmartz D, De Groote F, Mathieu N, Willaert P, Rausin I, Vincent JL: Critical haemoglobin concentration in anesthetized dogs: Comparison of two plasma substitutes. *Br J Anaesth* 1998; 81:556–62
2. Räsänen J: Supply-dependent oxygen consumption and mixed venous oxygen hemoglobin saturation during isovolemic hemodilution in pigs. *Chest* 1992; 101:1121–4
3. Cain SM: Oxygen delivery and uptake in dogs during anemic and hypoxic hypoxia. *J Appl Physiol* 1977; 42:228–34
4. Cain SM, Chapler CK:  $\text{O}_2$  extraction by hind limb versus whole dog during anemic hypoxia. *J Appl Physiol* 1978; 45:966–70
5. Trouwborst A, Tenbrinck R, Van Woerkens ECSM: Blood gas analysis of mixed venous blood during normoxic acute isovolemic hemodilution in pigs. *Anesth Analg* 1990; 70:523–9
6. Van Woerkens ECSM, Trouwborst A, Van Lanschot JJB: Profound hemodilution: What is the critical level of hemodilution at which oxygen delivery-dependent oxygen consumption starts in an anesthetized human? *Anesth Analg* 1992; 75:818–21
7. Van Bommel J, Siegemund M, Henny CP, Trouwborst A, Ince C: Critical hematocrit in intestinal tissue oxygenation during severe normovolemic hemodilution. *ANESTHESIOLOGY* 2001; 94:152–60
8. Van Woerkens ECSM, Trouwborst A, Duncker DJGM, Koning MMG, Boomsma F, Verdouw PD: Catecholamines and regional hemodynamics during isovolemic hemodilution in anesthetized pigs. *J Appl Physiol* 1992; 72:760–9

9. Crystal GJ, Rooney MW, Salem MR: Regional hemodynamics and oxygen supply during isovolemic hemodilution alone and in combination with adenosine-induced controlled hypotension. *Anesth Analg* 1988; 67:211-8
10. Fan FC, Chen RYZ, Schuessler GB, Chien S: Effects of hematocrit variations on regional hemodynamics and oxygen transport in the dog. *Am J Physiol* 1980; 238:H545-52
11. Woodson RD, Auerbach S: Effect of increased oxygen affinity and anemia on cardiac output and its distribution. *J Appl Physiol* 1982; 53:1299-1306
12. Holzman IR, Tabata B, Edelstone DI: Blood flow and oxygen delivery to the organs of the neonatal lamb as a function of hematocrit. *Pediatr Res* 1986; 20:1274-9
13. Nöldge GF, Priebe HJ, Bohle W, Buttler KJ, Geiger K: Effects of acute normovolemic hemodilution on splanchnic oxygenation and on hepatic histology and metabolism in anesthetized pigs. *ANESTHESIOLOGY* 1991; 74:908-18
14. Haisjackl M, Luz G, Sparr H, Germann R, Salak N, Friesenecker B, Deusch E, Meusbürger S, Hasibeder W: The effect of progressive anemia on jejunal mucosal and serosal tissue oxygenation in pigs. *Anesth Analg* 1997; 84:538-44
15. Sanders M, White FC, Bloor CM: Cardiovascular responses of dogs and pigs exposed to similar physiologic stress. *Comp Biochem Physiol* 1977; 58:365-70
16. Swindle MM: Swine as replacement for dogs in the surgical teaching and research laboratory. *Lab Anim Sci* 1984; 34:383-5
17. Sinaasappel M, Van Iterson M, Ince C: Microvascular oxygen pressure in the pig intestine during hemorrhagic shock and resuscitation. *J Physiol* 1999; 514:245-53
18. Van Iterson M, Sinaasappel M, Burhop K, Trouwborst A, Ince C: Low-volume resuscitation with a hemoglobin-based oxygen carrier after hemorrhage improves gut microvascular oxygenation in swine. *J Lab Clin Med* 1998; 132:421-31
19. Gedeberg R, Silander HC, Ronne-Engström E, Rubertsson S, Wiklund L: Adverse effects of high-dose epinephrine on cerebral blood flow during experimental cardiopulmonary resuscitation. *Crit Care Med* 2000; 28:1423-30
20. Matta BF, Lam AM, Mayberg TS, Shapira Y, Winn HR: A critique of the intraoperative use of jugular venous bulb catheters during neurosurgical procedures. *Anesth Analg* 1994; 79:745-50
21. Matta BF, Lam AM: The speed of blood withdrawal affects the accuracy of jugular venous bulb oxygen saturation measurements. *ANESTHESIOLOGY* 1997; 86:806-8
22. Trouwborst A, Van Bommel J, Ince C, Henny CP: Monitoring normovolemic hemodilution. *Br J Anaesth* 1998; 81:73-8
23. Vanderkooi JM, Maniara G, Green TJ, Wilson DF: An optical method for measurement of dioxygen concentration based upon quenching of phosphorescence. *J Biol Chem* 1987; 262:5476-82
24. Sinaasappel M, Ince C: Calibration of Pd-porphyrin phosphorescence for oxygen concentration measurements in vivo. *J Appl Physiol* 1996; 81:2297-303
25. Wilson DF, Pastuszko A, DiGiacomo JE, Pawlowski M, Schneiderman R, Delivoria-Papadopoulos M: Effect of hyperventilation on oxygenation of the brain cortex of newborn piglets. *J Appl Physiol* 1991; 70:2691-6
26. Shonat RD, Johnson PC: Oxygen tension gradients and heterogeneity in venous microcirculation: A phosphorescence quenching study. *Am J Physiol* 1997; 270:H2233-40
27. Sinaasappel M, Donkersloot K, Van Bommel J, Ince C: PO<sub>2</sub> measurements in the rat intestinal microcirculation. *Am J Physiol* 1999; 276:G1515-20
28. Van Bommel J, Siegemund M, Henny CP, Van den Heuvel DAF, Trouwborst A, Ince C: Preservation of intestinal microvascular PO<sub>2</sub> during normovolemic hemodilution in a rat model. *J Lab Clin Med* 2000; 135:476-83
29. Schlichtig R, Kramer DJ, Pinsky MR: Flow redistribution during progressive hemorrhage is a determinant of critical oxygen delivery. *J Appl Physiol* 1991; 70:169-78
30. Glick G, Plauth WH, Braunwald E: Role of the autonomic nervous system in the circulatory response to acutely induced anemia in unanesthetized dogs. *J Clin Invest* 1964; 43:2112-24
31. Chapler CK, Cain SM: The physiologic reserve in oxygen carrying capacity: Studies in experimental hemodilution. *Can J Physiol Pharmacol* 1986; 64:7-12
32. Spahn DR, Leone BJ, Reves JG, Pasch T: Cardiovascular and coronary physiology of acute isovolemic hemodilution: A review of nonoxygen carrying and oxygen-carrying solutions. *Anesth Analg* 1994; 78:1000-21
33. Matheson B, Razynska A, O'Hearne M, Bucci E: Renal response to hemodilution with albumin or crosslinked bovine hemoglobin: Role of nitric oxide. *J Lab Clin Med* 1998; 132:47-53
34. Doss DN, Estafanous FG, Ferrario CM, Brum JM, Murray PA: Mechanism of systemic vasodilation during normovolemic hemodilution. *Anesth Analg* 1995; 81:30-4
35. Panes J, Casadevall M, Pique JM, Bosch J, Whittle BJR, Teres J: Effects of acute normovolemic anemia on gastric mucosal blood flow in rats: role of nitric oxide. *Gastroenterology* 1992; 103:407-13
36. Tomiyama Y, Jansen K, Brian JE Jr, Todd MM: Hemodilution, cerebral O<sub>2</sub> delivery, and cerebral blood flow: A study using hyperbaric oxygenation. *Am J Physiol* 1999; 276:H1190-6
37. Massik J, Tang YL, Hudak ML, Koehler RC, Traystman RJ, Jones MD Jr: Effect of hematocrit on cerebral blood flow with induced polycythemia. *J Appl Physiol* 1987; 62:1090-6
38. Hudak ML, Koehler RC, Rosenberg AA, Traystman RJ, Jones MD Jr: Effect of hematocrit on cerebral blood flow. *Am J Physiol* 1986; 251:H63-70
39. Todd MM, Farrell S, Wu B: Cerebral blood flow during hypoxemia and hemodilution in rabbits: Different roles for nitric oxide? *J Cereb Blood Flow Metab* 1997; 17:1319-25
40. Brazier J, Cooper N, Maloney JV, Buckberg G: The adequacy of myocardial oxygen delivery in acute normovolemic anemia. *Surgery* 1974; 75:508-16
41. Levy PS, Kim SJ, Eckel PE, Chavez R, Ismail EF, Gould SA, Salem MR, Crystal GJ: Limit to cardiac compensation during acute isovolemic hemodilution: Influence of coronary stenosis. *Am J Physiol* 1993; 265:H340-9
42. Wright CJ: The effects of severe progressive hemodilution on regional blood flow and oxygen consumption. *Surgery* 1976; 79:299-305
43. Trouwborst A, Van Woerkens ECSM, Tenbrinck R: Hemodilution and oxygen transport. *Adv Exp Med Biol* 1992; 317:431-40
44. Von Restorff W, Hofling B, Holtz J, Bassenge E: Effect of increased blood fluidity through hemodilution on general circulation at rest and during exercise in dogs. *Pflügers Arch* 1975; 357:25-34
45. Weiskopf RB, Viele MK, Feiner J, Kelley S, Lieberman J, Noorani M, Leung JM, Fisher DM, Murray WR, Toy P, Moore MA: Human cardiovascular and metabolic response to acute, severe isovolemic anemia. *JAMA* 1998; 279:217-21
46. Lieberman JA, Weiskopf RB, Kelley SD, Feiner J, Noorani M, Leung J, Toy P, Viele M: Critical oxygen delivery in conscious humans is less than 7.3 ml O<sub>2</sub> · kg<sup>-1</sup> · min<sup>-1</sup>. *ANESTHESIOLOGY* 2000; 92:407-13
47. Lindbom L, Tuma RF, Arfors KE: Influence of oxygen on perfused capillary density and capillary red cell velocity in rabbit skeletal muscle. *Microvasc Res* 1980; 19:197-208
